# Supplementary material for: A Cosine Similarity-Based Method to Infer Variability of Chromatin Accessibility at the Single-Cell Level
Source: PubMed Central journal article supplement (PMC6103536; doi:10.3389/fgene.2018.00319), 2018-08-15

Fig S2

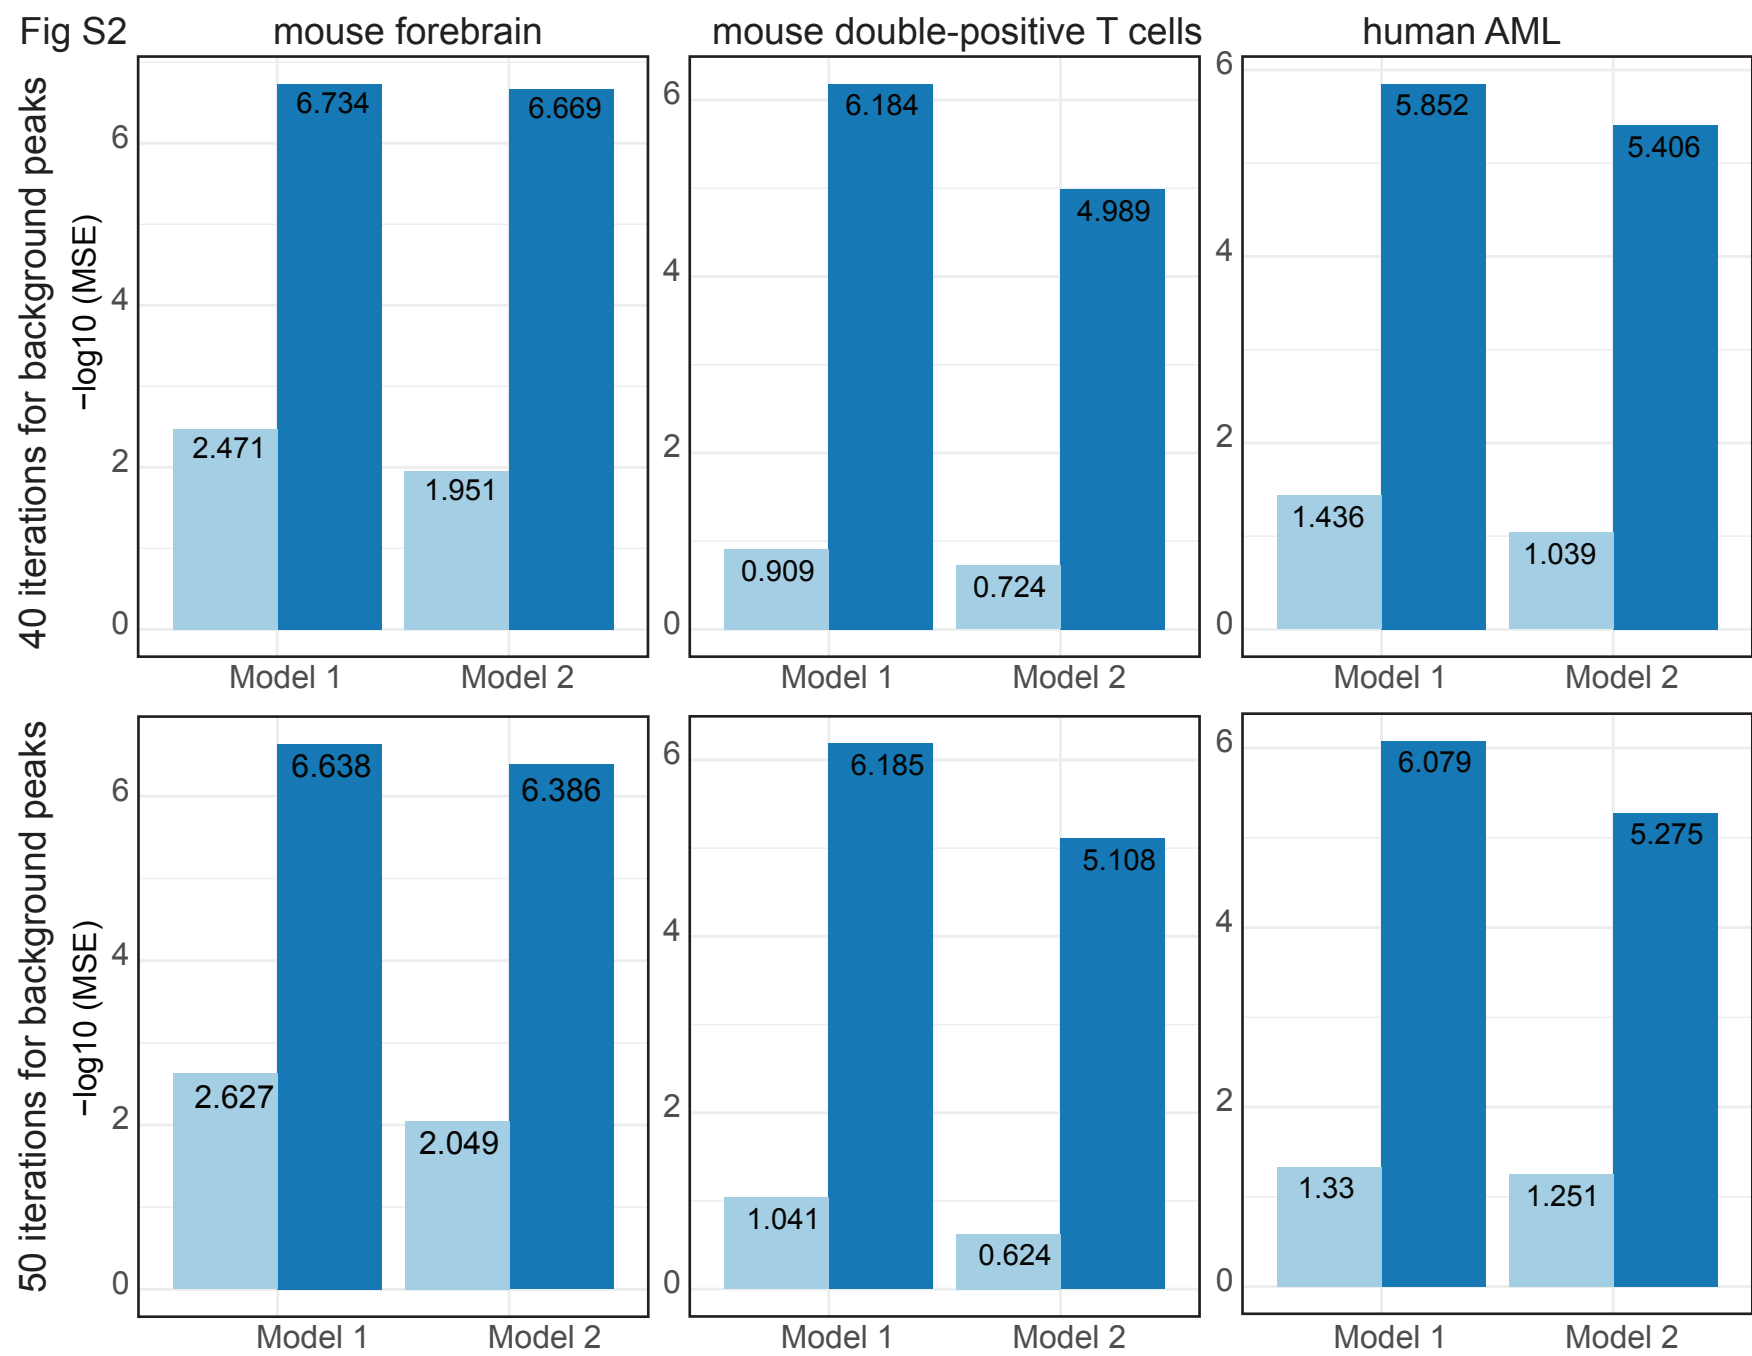

Supplement: Image_2.pdf [file Image_2.pdf]
